# Supplementary material for: Accurate Prediction of a Quantitative Trait Using the Genes Controlling the Trait for Gene-Based Breeding in Cotton
Source: Front Plant Sci. 2020 Nov 9;11:583277. doi: 10.3389/fpls.2020.583277 (PMC7690289; doi:10.3389/fpls.2020.583277)
Supplement: Supplementary Table 7 — Genotypes of 226 SNPs/InDels contained in 226 GFL genes, with only one SNP or InDel per gene, for prediction of fiber length. [file Table_7.XLSX]

## Sheet: Sheet1
SUPPLEMENTARY TABLE S1. Selection of the key GFL genes for GBB, according to their effects on fiber length (A), the effects of their SNP/InDel mutations on fiber length (B), and/or their roles in the GFL network (C). For the sequences of the GFL genes, see NCBI accession numbers: __________.
(A) 474 GFL genes having positive or negative effects on fiber length:
Effect-positive GFL genes (largest - smallest)	Effect-negative GFL genes (largest - smallest)
GFL474	GFL001
GFL473	GFL002
GFL472	GFL003
GFL471	GFL004
GFL470	GFL005
GFL469	GFL006
GFL468	GFL007
GFL467	GFL008
GFL466	GFL009
GFL465	GFL010
GFL464	GFL011
GFL463	GFL012
GFL462	GFL013
GFL461	GFL014
GFL460	GFL015
GFL459	GFL016
GFL458	GFL017
GFL457	GFL018
GFL456	GFL019
GFL455	GFL020
GFL454	GFL021
GFL453	GFL022
GFL452	GFL023
GFL451	GFL024
GFL450	GFL025
GFL449	GFL026
GFL448	GFL027
GFL447	GFL028
GFL446	GFL029
GFL445	GFL030
GFL444	GFL031
GFL443	GFL032
GFL442	GFL033
GFL441	GFL034
GFL440	GFL035
GFL439	GFL036
GFL438	GFL037
GFL437	GFL038
GFL436	GFL039
GFL435	GFL040
GFL434	GFL041
GFL433	GFL042
GFL432	GFL043
GFL431	GFL044
GFL430	GFL045
GFL429	GFL046
GFL428	GFL047
GFL427	GFL048
GFL426	GFL049
GFL425	GFL050
GFL424	GFL051
GFL423	GFL052
GFL422	GFL053
GFL421	GFL054
	GFL055
	GFL056
	GFL057
	GFL058
	GFL059
	GFL060
	GFL061
	GFL062
	GFL063
	GFL064
	GFL065
	GFL066
	GFL067
	GFL068
	GFL069
	GFL070
	GFL071
	GFL072
	GFL073
	GFL074
	GFL075
	GFL076
	GFL077
	GFL078
	GFL079
	GFL080
	GFL081
	GFL082
	GFL083
	GFL084
	GFL085
	GFL086
	GFL087
	GFL088
	GFL089
	GFL090
	GFL091
	GFL092
	GFL093
	GFL094
	GFL095
	GFL096
	GFL097
	GFL098
	GFL099
	GFL100
	GFL101
	GFL102
	GFL103
	GFL104
	GFL105
	GFL106
	GFL107
	GFL108
	GFL109
	GFL110
	GFL111
	GFL112
	GFL113
	GFL114
	GFL115
	GFL116
	GFL117
	GFL118
	GFL119
	GFL120
	GFL121
	GFL122
	GFL123
	GFL124
	GFL125
	GFL126
	GFL127
	GFL128
	GFL129
	GFL130
	GFL131
	GFL132
	GFL133
	GFL134
	GFL135
	GFL136
	GFL137
	GFL138
	GFL139
	GFL140
	GFL141
	GFL142
	GFL143
	GFL144
	GFL145
	GFL146
	GFL147
	GFL148
	GFL149
	GFL150
	GFL151
	GFL152
	GFL153
	GFL154
	GFL155
	GFL156
	GFL157
	GFL158
	GFL159
	GFL160
	GFL161
	GFL162
	GFL163
	GFL164
	GFL165
	GFL166
	GFL167
	GFL168
	GFL169
	GFL170
	GFL171
	GFL172
	GFL173
	GFL174
	GFL175
	GFL176
	GFL177
	GFL178
	GFL179
	GFL180
	GFL181
	GFL182
	GFL183
	GFL184
	GFL185
	GFL186
	GFL187
	GFL188
	GFL189
	GFL190
	GFL191
	GFL192
	GFL193
	GFL194
	GFL195
	GFL196
	GFL197
	GFL198
	GFL199
	GFL200
	GFL201
	GFL202
	GFL203
	GFL204
	GFL205
	GFL206
	GFL207
	GFL208
	GFL209
	GFL210
	GFL211
	GFL212
	GFL213
	GFL214
	GFL215
	GFL216
	GFL217
	GFL218
	GFL219
	GFL220
	GFL221
	GFL222
	GFL223
	GFL224
	GFL225
	GFL226
	GFL227
	GFL228
	GFL229
	GFL230
	GFL231
	GFL232
	GFL233
	GFL234
	GFL235
	GFL236
	GFL237
	GFL238
	GFL239
	GFL240
	GFL241
	GFL242
	GFL243
	GFL244
	GFL245
	GFL246
	GFL247
	GFL248
	GFL249
	GFL250
	GFL251
	GFL252
	GFL253
	GFL254
	GFL255
	GFL256
	GFL257
	GFL258
	GFL259
	GFL260
	GFL261
	GFL262
	GFL263
	GFL264
	GFL265
	GFL266
	GFL267
	GFL268
	GFL269
	GFL270
	GFL271
	GFL272
	GFL273
	GFL274
	GFL275
	GFL276
	GFL277
	GFL278
	GFL279
	GFL280
	GFL281
	GFL282
	GFL283
	GFL284
	GFL285
	GFL286
	GFL287
	GFL288
	GFL289
	GFL290
	GFL291
	GFL292
	GFL293
	GFL294
	GFL295
	GFL296
	GFL297
	GFL298
	GFL299
	GFL300
	GFL301
	GFL302
	GFL303
	GFL304
	GFL305
	GFL306
	GFL307
	GFL308
	GFL309
	GFL310
	GFL311
	GFL312
	GFL313
	GFL314
	GFL315
	GFL316
	GFL317
	GFL318
	GFL319
	GFL320
	GFL321
	GFL322
	GFL323
	GFL324
	GFL325
	GFL326
	GFL327
	GFL328
	GFL329
	GFL330
	GFL331
	GFL332
	GFL333
	GFL334
	GFL335
	GFL336
	GFL337
	GFL338
	GFL339
	GFL340
	GFL341
	GFL342
	GFL343
	GFL344
	GFL345
	GFL346
	GFL347
	GFL348
	GFL349
	GFL350
	GFL351
	GFL352
	GFL353
	GFL354
	GFL355
	GFL356
	GFL357
	GFL358
	GFL359
	GFL360
	GFL361
	GFL362
	GFL363
	GFL364
	GFL365
	GFL366
	GFL367
	GFL368
	GFL369
	GFL370
	GFL371
	GFL372
	GFL373
	GFL374
	GFL375
	GFL376
	GFL377
	GFL378
	GFL379
	GFL380
	GFL381
	GFL382
	GFL383
	GFL384
	GFL385
	GFL386
	GFL387
	GFL388
	GFL389
	GFL390
	GFL391
	GFL392
	GFL393
	GFL394
	GFL395
	GFL396
	GFL397
	GFL398
	GFL399
	GFL400
	GFL401
	GFL402
	GFL403
	GFL404
	GFL405
	GFL406
	GFL407
	GFL408
	GFL409
	GFL410
	GFL411
	GFL412
	GFL413
	GFL414
	GFL415
	GFL416
	GFL417
	GFL418
	GFL419
	GFL420
(B) 19 GFL genes whose edge number variation in the GFL network significantly influenced fiber length (from Liu, 2014):
GFL003	GFL229
GFL013	GFL244
GFL015	GFL250
GFL053	GFL270
GFL069	GFL318
GFL098	GFL387
GFL106	GFL421
GFL130	GFL429
GFL132	GFL430
(C) 226 GFLgenes containing SNP/InDel mutations that significantly influenced fiber length:
GFL001	GFL092	GFL164	GFL272	GFL375
GFL002	GFL093	GFL165	GFL274	GFL377
GFL005	GFL095	GFL167	GFL275	GFL382
GFL008	GFL096	GFL168	GFL276	GFL384
GFL009	GFL097	GFL169	GFL279	GFL385
GFL011	GFL098	GFL175	GFL282	GFL386
GFL012	GFL100	GFL176	GFL284	GFL387
GFL016	GFL103	GFL177	GFL285	GFL388
GFL017	GFL104	GFL178	GFL287	GFL389
GFL020	GFL105	GFL180	GFL289	GFL391
GFL021	GFL106	GFL182	GFL290	GFL395
GFL023	GFL108	GFL185	GFL295	GFL396
GFL025	GFL110	GFL187	GFL298	GFL398
GFL026	GFL111	GFL190	GFL301	GFL400
GFL028	GFL112	GFL192	GFL307	GFL401
GFL031	GFL114	GFL193	GFL309	GFL405
GFL034	GFL115	GFL195	GFL310	GFL409
GFL035	GFL117	GFL196	GFL312	GFL411
GFL036	GFL120	GFL197	GFL315	GFL414
GFL037	GFL122	GFL199	GFL319	GFL425
GFL038	GFL123	GFL201	GFL322	GFL427
GFL041	GFL124	GFL202	GFL324	GFL428
GFL044	GFL126	GFL203	GFL325	GFL433
GFL045	GFL128	GFL205	GFL326	GFL438
GFL047	GFL129	GFL207	GFL327	GFL439
GFL048	GFL132	GFL210	GFL328	GFL441
GFL051	GFL133	GFL212	GFL330	GFL443
GFL052	GFL135	GFL217	GFL331	GFL444
GFL055	GFL138	GFL218	GFL332	GFL445
GFL057	GFL139	GFL223	GFL335	GFL446
GFL058	GFL140	GFL224	GFL336	GFL450
GFL062	GFL142	GFL225	GFL337	GFL451
GFL064	GFL145	GFL229	GFL338	GFL452
GFL066	GFL147	GFL232	GFL339	GFL453
GFL069	GFL149	GFL234	GFL343	GFL455
GFL073	GFL150	GFL236	GFL344	GFL458
GFL076	GFL151	GFL237	GFL345	GFL460
GFL077	GFL152	GFL238	GFL347	GFL461
GFL078	GFL155	GFL246	GFL354	GFL463
GFL080	GFL156	GFL251	GFL360	GFL467
GFL081	GFL157	GFL253	GFL361	GFL468
GFL083	GFL158	GFL256	GFL366	GFL469
GFL085	GFL160	GFL263	GFL369	GFL472
GFL087	GFL162	GFL267	GFL370	GFL473
GFL089	GFL163	GFL268	GFL371	GFL474
GFL091
GFL137
